# Supplementary material for: Measurement report: Balloon-borne in situ profiling of Saharan dust over Cyprus with the UCASS optical particle counter
Source: Copernicus journal article supplement (doi:10.5194/acp-21-6781-2021), 2021-05-05
Supplement: Supplementary file [file acp-21-6781-2021-supplement-title-page.pdf › acp-21-6781-2021-supplement-title-page.pdf]

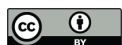

## *Supplement of*

# **Measurement report: Balloon-borne in situ profiling of Saharan dust over Cyprus with the UCASS optical particle counter**

**Maria Kezoudi et al.**

*Correspondence to:* Maria Kezoudi (m.kezoudi@cyi.ac.cy)

- acp-21-6781-2021-supplement-title-page.pdf
- 20170420\_flight1.csv
- 20170421\_flight2.csv
- 20170421\_flight3.csv
- 20170422\_flight5.csv

The copyright of individual parts of the supplement might differ from the article licence.
